# Supplementary material
Source: MDPI journal article supplement (https://www.mdpi.com/2073-4395/14/3/581)
Supplement: s1 [file s1]

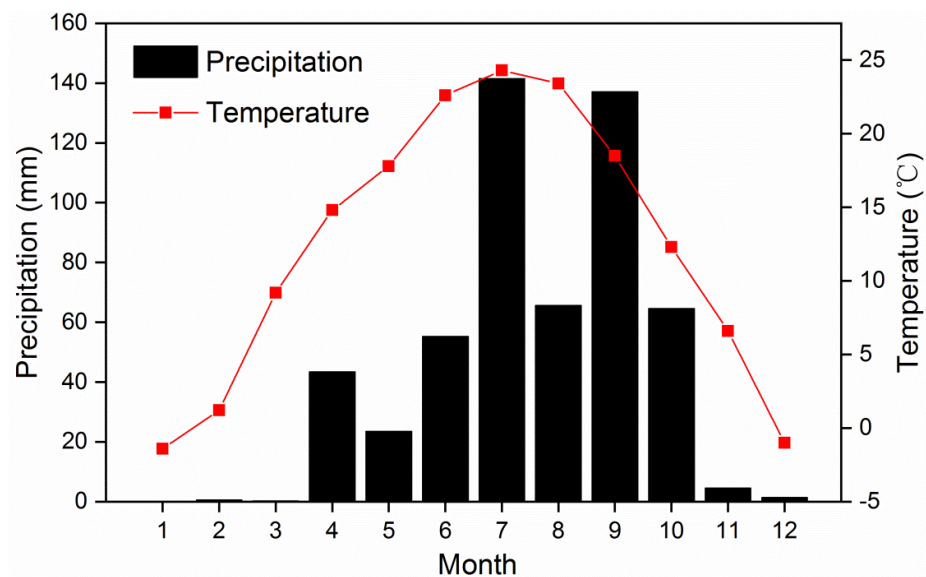

**Figure S1.** Precipitation (mm) and average temperature (°C) in 2019.

**Table S1.** Enzymes assayed in soils and corresponding substrates, abbreviations used in this study, and enzyme commission number.

| Enzyme                           | Substrate                                | Abbreviation | EC       |
|----------------------------------|------------------------------------------|--------------|----------|
| $\beta$ -glucosidase             | 4-MUB- $\beta$ -D-glucopyranoside        | BG           | 3.2.1.21 |
| $\beta$ -N-acetylglucosaminidase | 4-MUB-N-acetyl- $\beta$ -D-glucosaminide | NAG          | 3.2.1.52 |
| L-leucine aminopeptidase         | L-leucine-7-amino-4-methylcoumarin       | LAP          | 3.4.11.1 |
| Alkaline phosphatase             | 4-MUB-phosphate                          | AKP          | 3.1.3.2  |

EC, Enzyme Commission number describing enzymatic function at increasing level of detail (the first number distinguishes 1-oxidoreductases, 2-transferases, 3-hydrolases, 4-lyases, 5-isomerases, and 6-ligases).

**Table S2.** Means ( $\pm$  standard deviation) of soil physicochemical properties under different treatments within each growth period.

| Period   | Treatment | SWC (%)           | SOC<br>(g kg <sup>-1</sup> ) | TN<br>(g kg <sup>-1</sup> ) | TP<br>(g kg <sup>-1</sup> ) | DOC<br>(mg kg <sup>-1</sup> ) | DON<br>(mg kg <sup>-1</sup> ) | AN<br>(mg kg <sup>-1</sup> ) | AP<br>(mg kg <sup>-1</sup> ) | DOC:DON           | C:N                 | C:P                 | N:P               |
|----------|-----------|-------------------|------------------------------|-----------------------------|-----------------------------|-------------------------------|-------------------------------|------------------------------|------------------------------|-------------------|---------------------|---------------------|-------------------|
| Budding  | CK        | 9.62 $\pm$ 0.24ef | 8.94 $\pm$ 0.12d             | 0.82 $\pm$ 0.01d            | 0.59 $\pm$ 0.06e            | 9.63 $\pm$ 0.61d              | 4.23 $\pm$ 0.86g              | 4.96 $\pm$ 0.08g             | 7.60 $\pm$ 1.04f             | 2.34 $\pm$ 0.48b  | 10.91 $\pm$ 0.16ab  | 15.28 $\pm$ 1.25a   | 1.40 $\pm$ 0.13ab |
|          | M         | 9.33 $\pm$ 0.23f  | 9.79 $\pm$ 0.33c             | 0.97 $\pm$ 0.06b            | 0.66 $\pm$ 0.12cde          | 19.27 $\pm$ 1.46b             | 17.61 $\pm$ 0.26c             | 6.61 $\pm$ 0.18f             | 14.67 $\pm$ 0.85e            | 1.09 $\pm$ 0.07c  | 10.13 $\pm$ 0.98bcd | 15.05 $\pm$ 2.10ab  | 1.51 $\pm$ 0.34a  |
|          | NPK       | 12.01 $\pm$ 0.18c | 7.97 $\pm$ 0.14e             | 0.82 $\pm$ 0.03d            | 0.63 $\pm$ 0.06de           | 7.17 $\pm$ 2.96d              | 13.99 $\pm$ 0.31d             | 34.00 $\pm$ 0.26b            | 9.60 $\pm$ 0.93f             | 0.51 $\pm$ 0.22d  | 9.73 $\pm$ 0.21cd   | 12.72 $\pm$ 1.02c   | 1.31 $\pm$ 0.08ab |
|          | MNPK      | 17.12 $\pm$ 0.51a | 10.86 $\pm$ 0.25b            | 0.94 $\pm$ 0.03bc           | 0.79 $\pm$ 0.09abc          | 16.87 $\pm$ 1.01bc            | 29.12 $\pm$ 0.55a             | 4.93 $\pm$ 0.18g             | 24.27 $\pm$ 0.96b            | 0.58 $\pm$ 0.04d  | 11.59 $\pm$ 0.19a   | 13.84 $\pm$ 1.42abc | 1.19 $\pm$ 0.1b   |
|          | CCK       | 8.50 $\pm$ 0.19g  | 9.97 $\pm$ 0.56c             | 0.91 $\pm$ 0.01c            | 0.73 $\pm$ 0.07bcd          | 17.46 $\pm$ 1.66bc            | 3.74 $\pm$ 0.22g              | 11.36 $\pm$ 0.31e            | 7.67 $\pm$ 1.39f             | 4.68 $\pm$ 0.58a  | 10.92 $\pm$ 0.55ab  | 13.74 $\pm$ 0.71abc | 1.26 $\pm$ 0.12ab |
|          | CM        | 10.00 $\pm$ 0.21e | 11.19 $\pm$ 0.48b            | 1.09 $\pm$ 0.03a            | 0.85 $\pm$ 0.07ab           | 23.61 $\pm$ 1.62a             | 10.43 $\pm$ 0.48e             | 15.69 $\pm$ 0.21d            | 17.50 $\pm$ 0.15d            | 2.27 $\pm$ 0.15b  | 10.26 $\pm$ 0.53bc  | 13.26 $\pm$ 0.53bc  | 1.30 $\pm$ 0.12ab |
|          | CNPK      | 11.47 $\pm$ 0.46d | 8.29 $\pm$ 0.41de            | 0.89 $\pm$ 0.02c            | 0.63 $\pm$ 0.07de           | 8.65 $\pm$ 0.93d              | 6.04 $\pm$ 0.04f              | 45.02 $\pm$ 0.63a            | 20.87 $\pm$ 1.55c            | 1.43 $\pm$ 0.16c  | 9.28 $\pm$ 0.49d    | 13.19 $\pm$ 0.91bc  | 1.43 $\pm$ 0.18ab |
|          | CMNPK     | 15.50 $\pm$ 0.23b | 12.35 $\pm$ 0.89a            | 1.06 $\pm$ 0.01a            | 0.92 $\pm$ 0.06a            | 15.00 $\pm$ 1.62c             | 26.44 $\pm$ 1.19b             | 21.66 $\pm$ 0.79c            | 31.13 $\pm$ 1.86a            | 0.57 $\pm$ 0.08d  | 11.64 $\pm$ 0.73a   | 13.49 $\pm$ 0.20abc | 1.16 $\pm$ 0.06b  |
| Setting  | CK        | 12.76 $\pm$ 0.04g | 8.71 $\pm$ 0.21de            | 0.75 $\pm$ 0.04d            | 0.65 $\pm$ 0.03de           | 14.97 $\pm$ 1.14d             | 4.63 $\pm$ 0.16e              | 7.80 $\pm$ 0.39e             | 7.07 $\pm$ 0.76e             | 3.24 $\pm$ 0.33b  | 11.59 $\pm$ 0.41ab  | 13.33 $\pm$ 0.40bc  | 1.15 $\pm$ 0.02cd |
|          | M         | 14.33 $\pm$ 0.09d | 10.32 $\pm$ 0.84bc           | 0.98 $\pm$ 0.01bc           | 0.74 $\pm$ 0.05bc           | 24.25 $\pm$ 1.01b             | 30.98 $\pm$ 0.63d             | 21.74 $\pm$ 0.64d            | 13.87 $\pm$ 0.56d            | 0.78 $\pm$ 0.02c  | 10.54 $\pm$ 0.80bc  | 13.92 $\pm$ 0.23abc | 1.32 $\pm$ 0.08ab |
|          | NPK       | 13.68 $\pm$ 0.05f | 8.32 $\pm$ 0.73e             | 0.77 $\pm$ 0.03d            | 0.62 $\pm$ 0.03e            | 11.97 $\pm$ 0.89e             | 37.64 $\pm$ 0.77ab            | 30.01 $\pm$ 1.23c            | 13.70 $\pm$ 1.50d            | 0.32 $\pm$ 0.02d  | 10.79 $\pm$ 0.69abc | 13.36 $\pm$ 1.04bc  | 1.24 $\pm$ 0.03bc |
|          | MNPK      | 15.62 $\pm$ 0.11a | 10.32 $\pm$ 0.42bc           | 0.93 $\pm$ 0.12c            | 0.71 $\pm$ 0.02cd           | 28.69 $\pm$ 1.31a             | 39.55 $\pm$ 0.48a             | 22.74 $\pm$ 0.89d            | 29.83 $\pm$ 3.76b            | 0.73 $\pm$ 0.02c  | 11.14 $\pm$ 1.03abc | 14.57 $\pm$ 0.29a   | 1.32 $\pm$ 0.14ab |
|          | CCK       | 15.12 $\pm$ 0.14b | 9.13 $\pm$ 0.21de            | 0.79 $\pm$ 0.02d            | 0.74 $\pm$ 0.05bc           | 13.34 $\pm$ 1.01de            | 3.21 $\pm$ 0.09e              | 9.30 $\pm$ 1.15e             | 9.73 $\pm$ 0.40e             | 4.17 $\pm$ 0.35a  | 11.60 $\pm$ 0.06ab  | 12.30 $\pm$ 0.54d   | 1.06 $\pm$ 0.05d  |
|          | CM        | 11.88 $\pm$ 0.08h | 11.21 $\pm$ 1.05ab           | 1.04 $\pm$ 0.01b            | 0.79 $\pm$ 0.07ab           | 29.85 $\pm$ 1.99a             | 35.94 $\pm$ 0.16bc            | 40.14 $\pm$ 1.23b            | 21.70 $\pm$ 1.29c            | 0.83 $\pm$ 0.05c  | 10.81 $\pm$ 1.15abc | 14.13 $\pm$ 0.41ab  | 1.32 $\pm$ 0.13ab |
|          | CNPK      | 13.87 $\pm$ 0.12e | 9.61 $\pm$ 0.41cd            | 0.81 $\pm$ 0.03d            | 0.74 $\pm$ 0.04bc           | 19.62 $\pm$ 0.64c             | 36.47 $\pm$ 3.79bc            | 51.51 $\pm$ 1.17a            | 24.30 $\pm$ 1.07c            | 0.54 $\pm$ 0.05cd | 11.90 $\pm$ 0.26a   | 13.01 $\pm$ 0.66cd  | 1.09 $\pm$ 0.07cd |
|          | CMNPK     | 14.52 $\pm$ 0.02c | 12.26 $\pm$ 0.67a            | 1.19 $\pm$ 0.03a            | 0.83 $\pm$ 0.04a            | 28.71 $\pm$ 3.47a             | 35.06 $\pm$ 0.18c             | 49.88 $\pm$ 0.59a            | 35.53 $\pm$ 1.88a            | 0.82 $\pm$ 0.10c  | 10.27 $\pm$ 0.59c   | 14.72 $\pm$ 0.16a   | 1.44 $\pm$ 0.07a  |
| Swelling | CK        | 11.68 $\pm$ 0.2c  | 7.75 $\pm$ 0.13f             | 0.97 $\pm$ 0.02e            | 0.55 $\pm$ 0.02f            | 4.92 $\pm$ 0.62c              | 1.33 $\pm$ 0.23e              | 2.75 $\pm$ 0.27d             | 10.67 $\pm$ 0.93e            | 3.73 $\pm$ 0.21a  | 8.02 $\pm$ 0.29e    | 14.03 $\pm$ 0.64b   | 1.75 $\pm$ 0.05a  |
|          | M         | 10.76 $\pm$ 0.44d | 13.04 $\pm$ 0.48b            | 1.17 $\pm$ 0.01c            | 0.84 $\pm$ 0.02b            | 20.87 $\pm$ 2.41a             | 8.91 $\pm$ 0.02d              | 19.32 $\pm$ 0.63c            | 16.30 $\pm$ 2.55cd           | 2.34 $\pm$ 0.27bc | 11.16 $\pm$ 0.38a   | 15.53 $\pm$ 0.49a   | 1.39 $\pm$ 0.05de |
|          | NPK       | 12.51 $\pm$ 0.08b | 8.45 $\pm$ 0.46e             | 0.91 $\pm$ 0.01e            | 0.64 $\pm$ 0.05e            | 5.76 $\pm$ 1.59c              | 41.22 $\pm$ 0.17c             | 25.87 $\pm$ 2.93b            | 19.60 $\pm$ 1.35c            | 0.14 $\pm$ 0.04d  | 9.30 $\pm$ 0.51cd   | 13.34 $\pm$ 1.01bc  | 1.44 $\pm$ 0.1de  |
|          | MNPK      | 13.90 $\pm$ 0.28a | 9.88 $\pm$ 0.54c             | 1.29 $\pm$ 0.03b            | 0.77 $\pm$ 0.03c            | 17.59 $\pm$ 2.49a             | 56.21 $\pm$ 1.84a             | 36.47 $\pm$ 3.40a            | 23.97 $\pm$ 2.38b            | 0.31 $\pm$ 0.04d  | 7.66 $\pm$ 0.49e    | 12.87 $\pm$ 0.22c   | 1.68 $\pm$ 0.08ab |
|          | CCK       | 13.75 $\pm$ 0.22a | 9.29 $\pm$ 0.32cd            | 0.94 $\pm$ 0.06e            | 0.70 $\pm$ 0.01d            | 6.06 $\pm$ 0.07bc             | 2.22 $\pm$ 0.05e              | 3.70 $\pm$ 0.12d             | 14.10 $\pm$ 1.56de           | 2.73 $\pm$ 0.05b  | 9.86 $\pm$ 0.90bc   | 13.29 $\pm$ 0.42bc  | 1.35 $\pm$ 0.10e  |
|          | CM        | 10.71 $\pm$ 0.34d | 13.14 $\pm$ 0.22b            | 1.29 $\pm$ 0.03b            | 0.86 $\pm$ 0.04ab           | 20.28 $\pm$ 4.22a             | 8.74 $\pm$ 0.58d              | 19.41 $\pm$ 0.50c            | 18.27 $\pm$ 1.89c            | 2.33 $\pm$ 0.53c  | 10.16 $\pm$ 0.27b   | 15.30 $\pm$ 0.44a   | 1.51 $\pm$ 0.08cd |
|          | CNPK      | 11.09 $\pm$ 0.17d | 8.81 $\pm$ 0.24de            | 1.04 $\pm$ 0.01d            | 0.66 $\pm$ 0.04de           | 5.85 $\pm$ 2.79c              | 51.25 $\pm$ 6.41b             | 24.29 $\pm$ 1.40b            | 27.80 $\pm$ 2.25ab           | 0.11 $\pm$ 0.05d  | 8.46 $\pm$ 0.24de   | 13.38 $\pm$ 0.83bc  | 1.58 $\pm$ 0.09bc |
|          | CMNPK     | 11.92 $\pm$ 0.11c | 13.91 $\pm$ 0.46a            | 1.39 $\pm$ 0.07a            | 0.92 $\pm$ 0.05a            | 9.94 $\pm$ 1.16b              | 56.58 $\pm$ 2.33a             | 25.76 $\pm$ 1.69b            | 30.70 $\pm$ 3.84a            | 0.18 $\pm$ 0.02d  | 10.03 $\pm$ 0.50bc  | 15.16 $\pm$ 0.42a   | 1.51 $\pm$ 0.05cd |
| Maturing | CK        | 18.87 $\pm$ 0.26c | 9.11 $\pm$ 0.29de            | 0.79 $\pm$ 0.03f            | 0.68 $\pm$ 0.10cd           | 8.14 $\pm$ 0.71g              | 2.93 $\pm$ 0.22e              | 6.09 $\pm$ 0.43c             | 29.67 $\pm$ 2.52b            | 2.78 $\pm$ 0.09c  | 11.55 $\pm$ 0.17a   | 13.65 $\pm$ 1.81bc  | 1.18 $\pm$ 0.14e  |
|          | M         | 19.37 $\pm$ 0.55b | 12.53 $\pm$ 0.27b            | 1.21 $\pm$ 0.09c            | 0.81 $\pm$ 0.01ab           | 23.58 $\pm$ 2.61d             | 3.03 $\pm$ 0.12e              | 4.92 $\pm$ 0.13d             | 15.60 $\pm$ 1.23e            | 7.78 $\pm$ 0.87a  | 10.54 $\pm$ 1.09ab  | 15.53 $\pm$ 0.45a   | 1.48 $\pm$ 0.11cd |
|          | NPK       | 17.74 $\pm$ 0.15e | 8.66 $\pm$ 0.41e             | 1.03 $\pm$ 0.05d            | 0.67 $\pm$ 0.08cd           | 9.51 $\pm$ 2.07g              | 6.07 $\pm$ 0.22d              | 6.43 $\pm$ 0.15c             | 23.73 $\pm$ 2.22c            | 1.56 $\pm$ 0.32d  | 8.38 $\pm$ 0.51c    | 12.99 $\pm$ 0.93c   | 1.55 $\pm$ 0.17c  |
|          | MNPK      | 20.69 $\pm$ 0.06a | 13.09 $\pm$ 0.39ab           | 1.14 $\pm$ 0.06c            | 0.87 $\pm$ 0.04a            | 30.68 $\pm$ 0.81b             | 9.64 $\pm$ 0.95b              | 7.56 $\pm$ 0.09b             | 33.70 $\pm$ 1.23a            | 3.21 $\pm$ 0.39bc | 11.54 $\pm$ 0.87a   | 15.12 $\pm$ 0.43ab  | 1.31 $\pm$ 0.1de  |
|          | CCK       | 18.25 $\pm$ 0.22d | 9.94 $\pm$ 0.27c             | 0.91 $\pm$ 0.02e            | 0.74 $\pm$ 0.05bc           | 12.82 $\pm$ 0.37f             | 7.55 $\pm$ 1.06c              | 3.20 $\pm$ 0.29e             | 19.23 $\pm$ 3.23d            | 1.72 $\pm$ 0.27d  | 10.90 $\pm$ 0.45ab  | 13.50 $\pm$ 0.74bc  | 1.24 $\pm$ 0.10e  |
|          | CM        | 20.72 $\pm$ 0.03a | 13.43 $\pm$ 0.38a            | 1.31 $\pm$ 0.04b            | 0.86 $\pm$ 0.03a            | 27.37 $\pm$ 1.83c             | 7.32 $\pm$ 0.28c              | 2.55 $\pm$ 0.22f             | 22.37 $\pm$ 0.67cd           | 3.75 $\pm$ 0.34b  | 10.34 $\pm$ 0.55b   | 15.56 $\pm$ 0.77a   | 1.51 $\pm$ 0.08c  |

|       |                |                |              |               |               |               |              |                |              |              |                |              |
|-------|----------------|----------------|--------------|---------------|---------------|---------------|--------------|----------------|--------------|--------------|----------------|--------------|
| CNPK  | 17.85 ± 0.24de | 9.36 ± 0.38cd  | 1.14 ± 0.03c | 0.62 ± 0.01d  | 16.19 ± 1.46e | 8.91 ± 0.06b  | 9.66 ± 0.60a | 30.47 ± 0.58ab | 1.82 ± 0.17d | 8.25 ± 0.50c | 15.13 ± 0.68ab | 1.84 ± 0.04b |
| CMNPK | 18.81 ± 0.32c  | 12.83 ± 0.62ab | 1.75 ± 0.02a | 0.82 ± 0.02ab | 35.62 ± 1.97a | 13.27 ± 0.21a | 4.62 ± 0.25d | 33.43 ± 2.66a  | 2.68 ± 0.16c | 7.33 ± 0.43c | 15.67 ± 1.07a  | 2.14 ± 0.03a |

Note: Different letters indicate significant differences ( $P < 0.05$ ) under different treatments within each growth period. Effects of fertilization (F), cover crop (C), and growth period (G) on these parameters were estimated by three-way repeated measures ANOVAs.

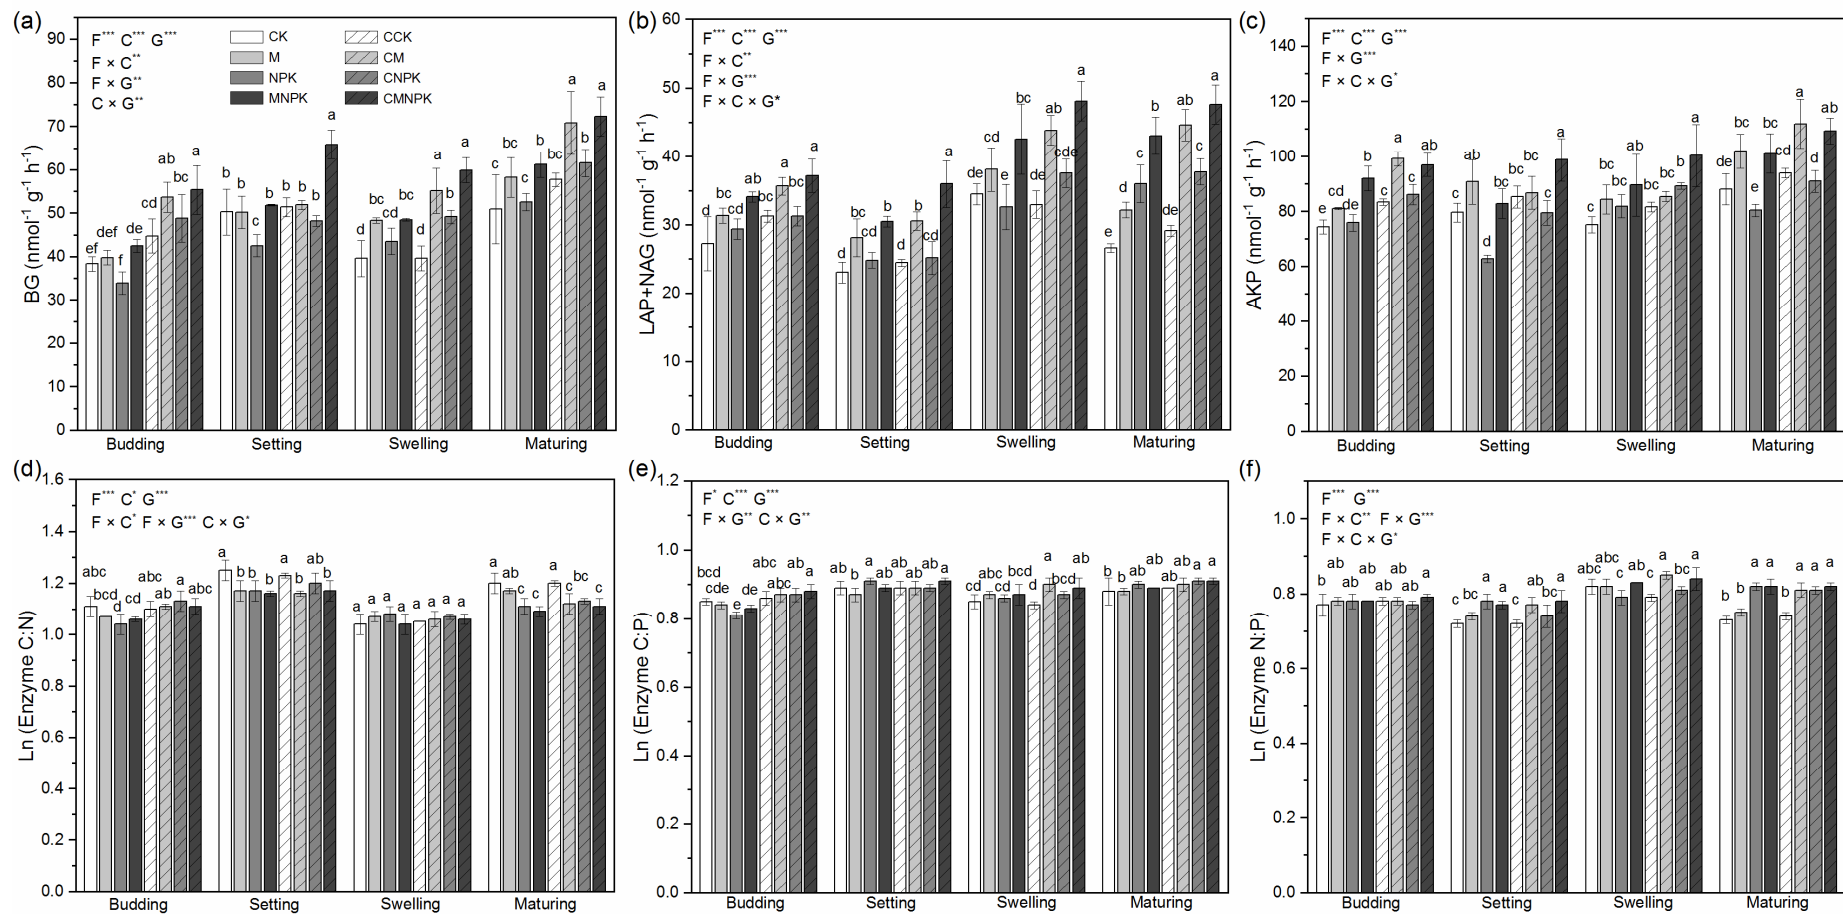

**Figure S2.** Variations in soil enzymatic activity and enzymatic stoichiometry under different treatments within each growth period. (a), C-acquiring enzymes: BG; (b), N-acquiring enzymes: LAP + NAG; (c), P-acquiring enzymes AKP; (d), enzyme C:N; (e), enzyme C:P; (f), enzyme N:P. Effects of fertilization (F), cover crop (C), and growth period (G) on these parameters were estimated by three-way repeated measures ANOVAs. \*,  $P < 0.05$ ; \*\*,  $P < 0.01$ ; \*\*\*,  $P < 0.001$ . Different letters indicate significant differences ( $P < 0.05$ ) under different treatments within each growth period. CK, no cover crop with no fertilizer; M, no cover crop with organic fertilizer; NPK, no cover crop with chemical fertilizer; MNPK, no cover crop with chemical fertilizer and organic fertilizer. CCK, cover crop with no fertilizer; CM, cover crop with organic fertilizer; CNPK, cover crop with chemical fertilizer; CMNPK, cover crop with chemical fertilizer and organic fertilizer.
